# Supplementary material for: Fluorescent Pan Traps Affect the Capture Rate of Insect Orders in Different Ways
Source: PubMed Central journal article supplement (PMC6410105; doi:10.3390/insects10020040), 2019-02-01
Supplement: insects-10-00040-s001.pdf [file insects-10-00040-s001.pdf]

Article

# Fluorescent Pan Traps Affect the Capture Rate of Insect Orders in Different Ways

Mani Shrestha<sup>1,2,\*</sup>, Jair E. Garcia<sup>1</sup>, Justin H. J. Chua<sup>1</sup>, Scarlett R. Howard<sup>1</sup>, Thomas Tscheulin<sup>3</sup>, Alan Dorin<sup>2</sup>, Anders Nielsen<sup>4</sup> and Adrian G. Dyer<sup>1,5</sup>

<sup>1</sup> School of Media and Communication, RMIT University, Melbourne, VIC 3001, Australia  
 jair.garcia@rmit.edu.au (J.E.G.); chua.heng.jie.justin@gmail.com (J.H.J.C.); scarlett.howard@rmit.edu.au (S.R.H.); adrian.dyer@rmit.edu.au (A.G.D.)

<sup>2</sup> Faculty of Information Technology, Monash University, Melbourne, VIC 3800, Australia;  
 alan.dorin@monash.edu

<sup>3</sup> Laboratory of Biogeography and Ecology Department of Geography University of the Aegean University Hill, GR-81100 Mytilene, Greece; t.tscheulin@geo.aegean.gr

<sup>4</sup> Centre for Ecological and Evolutionary Synthesis (CEES) Dept. of Biosciences, University of Oslo P.O. Box 1066 Blindern, 0316 Oslo, Norway; anders.nielsen@ibv.uio.no

<sup>5</sup> Department of Physiology, Monash University, Melbourne, VIC, 3800, Australia

\* Correspondence: sh.mani@gmail.com

**Table S1.** The number of insects captured using pan traps (PT) at each sampling site during various dates in Australian summer (January to May 2016). The pan traps colours are indicated by the following codes: B1 = blue-UV, B2 = blue-non-UV, W3 = white fluorescent, W4 = white UV, W5 = white UV, Y6 = yellow fluorescent, Y7 = yellow-non-fluorescent, g8 = green. In Figure 1 of the main manuscript, 1 = JMR (A–C), 2 = Indigenous garden, 3 = Monash University, 4 = Clayton, and 5 = Waverly Road.

| Study Site(s)     | Date(s)           | B1  | B2  | W3  | W4  | W5  | Y6  | Y7  | g8 | Total |
|-------------------|-------------------|-----|-----|-----|-----|-----|-----|-----|----|-------|
| MONASH UNI        | 15–17 Feb 2016    | 1   | 2   | 5   | 4   | 3   | 7   | 10  | 0  | 32    |
| Indigenous garden | 15–17 Feb 2016    | 8   | 14  | 16  | 12  | 13  | 16  | 6   | 0  | 85    |
| JMR.A             | 15–17 Feb 2016    | 3   | 5   | 10  | 6   | 10  | 12  | 7   | 0  | 53    |
| JMR.B             | 15–17 Feb 2016    | 4   | 4   | 11  | 8   | 10  | 17  | 11  | 0  | 65    |
| JMR.C             | 15–17 Feb 2016    | 0   | 8   | 13  | 14  | 17  | 5   | 12  | 0  | 69    |
| Waverly Road      | 15–17 Feb 2016    | 10  | 11  | 5   | 12  | 3   | 17  | 5   | 0  | 63    |
| Clayton           | 15–17 Feb 2016    | 15  | 14  | 8   | 11  | 10  | 12  | 6   | 0  | 76    |
| MONASH UNI        | 29 Feb–2 Mar 2016 | 3   | 13  | 4   | 5   | 4   | 10  | 7   | 4  | 50    |
| Indigenous garden | 29 Feb–2 Mar 2016 | 16  | 12  | 14  | 7   | 13  | 17  | 13  | 8  | 100   |
| JMR.A             | 29 Feb–2 Mar 2016 | 7   | 13  | 17  | 9   | 23  | 20  | 19  | 11 | 119   |
| JMR.B             | 29 Feb–2 Mar 2016 | 12  | 6   | 14  | 25  | 17  | 18  | 17  | 7  | 116   |
| JMR.C             | 29 Feb–2 Mar 2016 | 7   | 35  | 23  | 23  | 15  | 29  | 12  | 2  | 146   |
| Waverly Road      | 29 Feb–2 Mar 2016 | 5   | 2   | 10  | 7   | 3   | 7   | 0   | 10 | 44    |
| Clayton           | 29 Feb–2 Mar 2016 | 4   | 2   | 3   | 1   | 4   | 2   | 0   | 0  | 16    |
| MONASH UNI        | 15–17 Mar 2016    | 2   | 3   | 6   | 7   | 11  | 12  | 9   | 2  | 52    |
| Indigenous garden | 15–17 Mar 2016    | 12  | 21  | 18  | 15  | 35  | 27  | 6   | 8  | 142   |
| JMR.A             | 15–17 Mar 2016    | 3   | 7   | 15  | 2   | 5   | 15  | 13  | 15 | 75    |
| JMR.B             | 15–17 Mar 2016    | 16  | 9   | 15  | 16  | 12  | 17  | 22  | 8  | 115   |
| JMR.C             | 15–17 Mar 2016    | 10  | 13  | 19  | 15  | 21  | 10  | 15  | 6  | 109   |
| Waverly Road      | 15–17 Mar 2016    | 2   | 3   | 8   | 6   | 3   | 14  | 7   | 4  | 47    |
| Clayton           | 15–17 Mar 2016    | 6   | 8   | 4   | 8   | 6   | 14  | 3   | 1  | 50    |
| Total             |                   | 145 | 205 | 238 | 213 | 238 | 297 | 200 | 86 | 1624  |

**Table S2.** Complete list of the insect groups sampled in this study, including the total number of individuals collected by each pan trap colour (see details of the pan traps codes in Table S1 and in the main manuscript).

| Species Order/PT       | B1  | B2  | W3  | W5  | W4  | Y6  | Y7 | g8  | Total |
|------------------------|-----|-----|-----|-----|-----|-----|----|-----|-------|
| <b>Hymenoptera</b>     |     |     |     |     |     |     |    |     |       |
| Ants                   | 39  | 69  | 76  | 68  | 47  | 47  | 28 | 73  | 447   |
| Honey Bee              | 1   | 3   | 3   | 2   | 2   | 7   | 1  | 10  | 29    |
| Native Bee             | 10  | 28  | 17  | 15  | 13  | 40  | 0  | 19  | 142   |
| European wasp          | 1   | 1   | 3   | 3   | 5   | 2   | 0  | 1   | 16    |
| Native wasp            | 6   | 17  | 24  | 26  | 13  | 27  | 1  | 27  | 141   |
| <b>Diptera</b>         |     |     |     |     |     |     |    |     |       |
| Hoverflies             | 0   | 0   | 0   | 0   | 8   | 10  | 0  | 0   | 18    |
| Flies                  | 26  | 25  | 37  | 50  | 67  | 76  | 9  | 35  | 325   |
| Swarm fly              | 8   | 6   | 17  | 36  | 15  | 26  | 26 | 8   | 142   |
| Fruit fly              | 2   | 0   | 1   | 3   | 3   | 1   | 0  | 1   | 11    |
| Drosophila             | 1   | 0   | 2   | 0   | 1   | 2   | 0  | 1   | 7     |
| Tiny green flies       | 9   | 3   | 4   | 8   | 9   | 20  | 5  | 10  | 68    |
| Tiny midges            | 7   | 4   | 10  | 7   | 7   | 9   | 0  | 23  | 67    |
| Mosquito               | 2   | 0   | 3   | 3   | 4   | 5   | 9  | 2   | 28    |
| <b>Lepidoptera</b>     |     |     |     |     |     |     |    |     |       |
| Butterflies            | 3   | 3   | 5   | 2   | 2   | 9   | 0  | 6   | 30    |
| Moths                  | 1   | 1   | 0   | 0   | 0   | 6   | 0  | 0   | 8     |
| <b>Coleoptera</b>      |     |     |     |     |     |     |    |     |       |
| Beetles                | 20  | 31  | 1   | 0   | 0   | 2   | 0  | 17  | 71    |
| Weevils                | 3   | 2   | 2   | 0   | 1   | 0   | 4  | 0   | 12    |
| <b>Orthoptera</b>      |     |     |     |     |     |     |    |     |       |
| Grasshopper            | 1   | 3   | 0   | 0   | 1   | 1   | 2  | 1   | 9     |
| Cricket                | 2   | 0   | 1   | 1   | 0   | 0   | 0  | 1   | 5     |
| <b>Araneae</b>         |     |     |     |     |     |     |    |     |       |
| Spider                 | 2   | 4   | 6   | 3   | 1   | 3   | 1  | 3   | 23    |
| <b>Unknown Insects</b> |     |     |     |     |     |     |    |     |       |
| Total                  | 146 | 205 | 213 | 238 | 200 | 298 | 86 | 238 | 1624  |

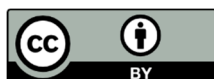

© 2019 by the authors. Licensee MDPI, Basel, Switzerland. This article is an open access article distributed under the terms and conditions of the Creative Commons Attribution (CC BY) license (<http://creativecommons.org/licenses/by/4.0/>).
